# Supplementary material
Source: publisher site journal article supplement (https://www.dovepress.com/article/410237)
Supplement: Supplementary file 1 [file get_supplementary_file.php]

**Supplementary Figure 1: Recurrence-based survival curve based on histological MVI in the whole cohort.**

**
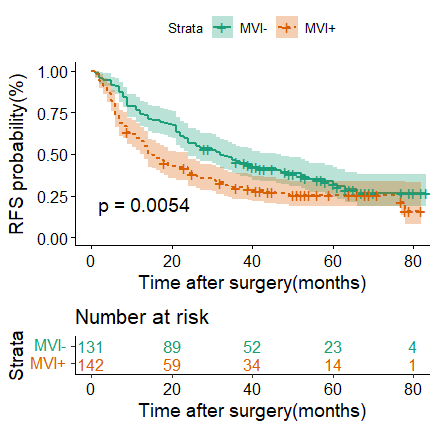
**

The graph shows mHCC patients with histological MVI+ had significantly shorter RFS than those with histological MVI- (log-rank test, *P*= 0.005). RFS = Recurrence-free Survival; MVI = Microvascular Invasion

**Supplementary Figure 2: The decision curve in the training and validation cohort**

**
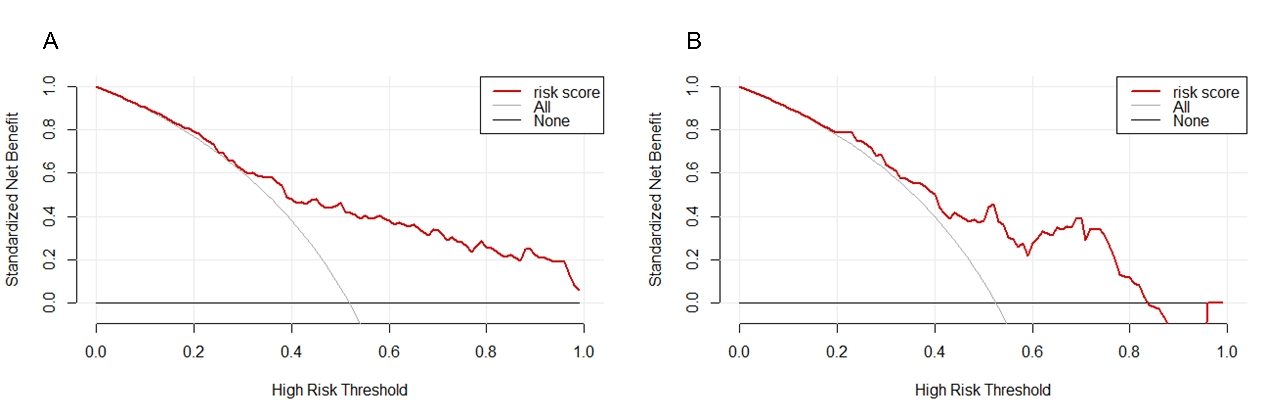
**

A and B represent the decision curves in the training cohort and validation cohort, respectively. Both graphs show that the risk score in this study exhibits an optimal net benefit with a wide range of threshold probability, which will improve the clinical outcome.

**Supplementary Table 1: Detailed parameters of MR sequences**

| Parameters | TR | TE | BW | FOV | Matrix | Section thickness(mm) | Acquisition  time (sec) |
| --- | --- | --- | --- | --- | --- | --- | --- |
| Respiratory-triggered T2-weighted imaging | 4918 | 106 | 195 | 285×380 | 384×273 | 5.5 | Respiration-  dependent |
| Free-breathing DWI a | 5100 | 55 | 1565 | 285×380 | 192×154 | 5.5 | 74 |
| Breath-hold T1-weighted in-phase and opposed-phase imaging | 6.88 | 2.39/4.77 | 435 | 356×380 | 320×240 | 3.5 | 18 |
| Breath-hold T1-weighted VIBE imaging | 3.47 | 1.36 | 400 | 308×380 | 320×240 | 3 | 15 |

Note. — TR = Repetition Time; TE = Echo Time; BW = Bandwidth; FOV = Field of View; DWI = Diffusion-Weighted Imaging;

VIBE = Volumetric Interpolated Breath-hold Examination

a performed with b values of 0 and 500 sec/mm2

**Supplementary Table 2: Interobserver agreement of imaging features in patients with multifocal HCC**

| MR feature | Kappa value/ICC value |
| --- | --- |
| Liver cirrhosis | 0.836 |
| Satellite nodule | 0.841 |
| Hemorrhage in mass | 0.768 |
| Fat in mass | 0.754 |
| Arterial rim enhancement | 0.871 |
| Absent or incomplete radiological capsule | 0.803 |
| Arterial peritumoral enhancement | 0.787 |
| Mosaic architecture | 0.709 |
| Nodule in nodule architecture | 0.885 |
| Non-smooth tumor margin | 0.759 |
| Atypical enhancement pattern | 0.746 |
| LTD | 0.969 |
| TTD | 0.959 |
| RLSD | 0.972 |

Note. — ICC = Intraclass Correlation Coefficient; LTD = The Largest Tumor Diameter; TTD = Total Tumor Diameter; RLSD = The Ratio of the Largest to the Smallest tumor Diameter

**Supplementary Material 1:** **Definitions of MR features**

The following MR features were evaluated in the study: a) tumor diameter was defined as the largest outer-edge-to-outer-edge dimension of the lesion. The measurement was carried out in the portal vein phase and included the radiological capsule1; b) satellite nodule was defined as the a smaller nodule attached to or within 2 cm of the main tumor2; c) hemorrhage in mass was defined as intralesional blood products in the absence of biopsy, trauma or intervention1; d) fat in mass was defined as the presence of lipid within a mass in higher concentration than in the background liver, which manifested as the single loss on out-of-phase compared with in-phase T1-weighed GRE images3; e) arterial rim enhancement was defined as the presence of irregular ring-line enhancement with central hypointense areas on the arterial phase1; f) radiological capsule was defined as peripheral rim of uniform and smooth hyperenhancement in the portal venous or delayed phase3; g) peritumoral enhancement was defined as the presence of enhancing area outside tumor border on the arterial phase, which becomes isointense with background liver parenchyma in the later dynamic phases4; h) mosaic architecture was defined as the presence within a mass of randomly distributed internal nodules or compartments differing in enhancement, intensity, shape and size and often separated by fibrous septations3; i) nodule-in-nodule architecture was defined as the presence of smaller inner nodule within a larger nodule or mass and having different imaging features1 ; j) atypical enhancement pattern was defined as the absence of arterial wash-in or portal venous/equilibrium wash-out5.

**Supplementary Material 2: Material and Method**

A risk score was developed by using the regression coefficients of the predictors in the multivariable regression. The score was the weighted sum of the rounded regression coefficients to an integer of positive variables6. In this study, TTD was selected as the reference risk factor as its regression coefficient was the smallest (0.201). We defined TTD ≤ 4 as 0 score and a 4-cm increase in TTD as 1 score. The risk scores for the other parameters were the rounded quotient of the regression coefficients for the parameters divided by the regression coefficient for 4-cm increase in TTD (0.207×4). For example, the risk score of the satellite nodule was calculate as: 2.563/ (0.207×4) = 3.095≈3, where 2.563 was the regression coefficient of the satellite nodule. The discrimination capability of the risk score was assessed with Harrell’s C-index. The optimism-corrected C-index was calculated using bootstrapping and 1000 iterations. The calibration performance was evaluated with a calibration curve. Decision curve analysis was constructed to determine the clinical usefulness of the risk score. The risk score was verified in the validation cohort.

**References**

1 Ajr AJOR. Liver Reporting & Data System (LI-RADS). www.acr.org/Clinical-Resources/Reporting-and-Data-Systems/LI-RADS. (accessed April 29, 2022).

2 Kim AY, Sinn DH, Jeong WK, et al. Hepatobiliary MRI as novel selection criteria in liver transplantation for hepatocellular carcinoma*. J Hepatol* 2018; 6(68): 1144-1152.

3 Choi JY, Lee JM, Sirlin CB. CT and MR imaging diagnosis and staging of hepatocellular carcinoma: part II. Extracellular agents, hepatobiliary agents, and ancillary imaging features*. Radiology* 2014; 1(273): 30-50.

4 Hong SB, Choi SH, Kim SY, et al. MRI Features for Predicting Microvascular Invasion of Hepatocellular Carcinoma: A Systematic Review and Meta-Analysis*. Liver Cancer* 2021; 2(10): 94-106.

5 Choi YS, Rhee H, Choi JY, et al. Histological characteristics of small hepatocellular carcinomas showing atypical enhancement patterns on gadoxetic acid-enhanced MR imaging*. J Magn Reson Imaging* 2013; 6(37): 1384-1391.

6 Sullivan LM, Massaro JM, D'Agostino RB. Presentation of multivariate data for clinical use: The Framingham Study risk score functions*. Stat Med* 2004; 10(23): 1631-1660.
